# Supplementary material for: Sub-5 μm balls possessing forest-like poly(methyloxazoline)/polyethyleneimine side chains and templated silica microballs with unusual internal structures
Source: Royal Society of Chemistry journal article supplement (doi:10.1039/c7ra05329k), 2017-01-01
Supplement: c7ra05329k1.pdf [file c7ra05329k1.pdf]

## **Supporting Information**

### **Sub-5 $\mu\text{m}$ Balls Possessing Forest-like Poly(methyloxazoline)/Polyethyleneimine Side Chains and Templated Silica Microballs with Unusual Internal Structures**

Daiki Soma and Ren-Hua Jin\*

Department of Material and Life Chemistry, Faculty of Engineering, Kanagawa University, 3-  
2-7, Rokkakubashi, Yokohama 221-8686, Japan

Corresponding author: [rhjin@kanagawa-u.ac.jp](mailto:rhjin@kanagawa-u.ac.jp)

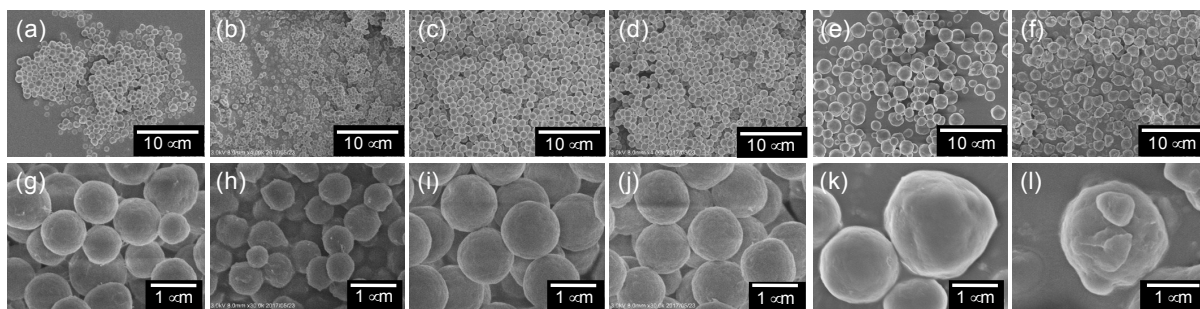

**Figure S1.** SEM images of  $\mu$ -PStCl prepared from different stabilizers: (a,g) PVP K60 ( $M_w = 160,000$ ); (b,h) PVP K90 ( $M_w = 600,000$ ); (c,i) Hydroxypropyl cellulose3~5.9 (HPC3~5.9,  $M_w = 160,000$ ); (d,j) HPC150~400 ( $M_w = 620,000$ ); (e,k) Poly(2-ethyl-2-oxazoline) (PEOZ,  $M_w = 50,000$ ); (f,l) PEOZ ( $M_w = 500,000$ ).

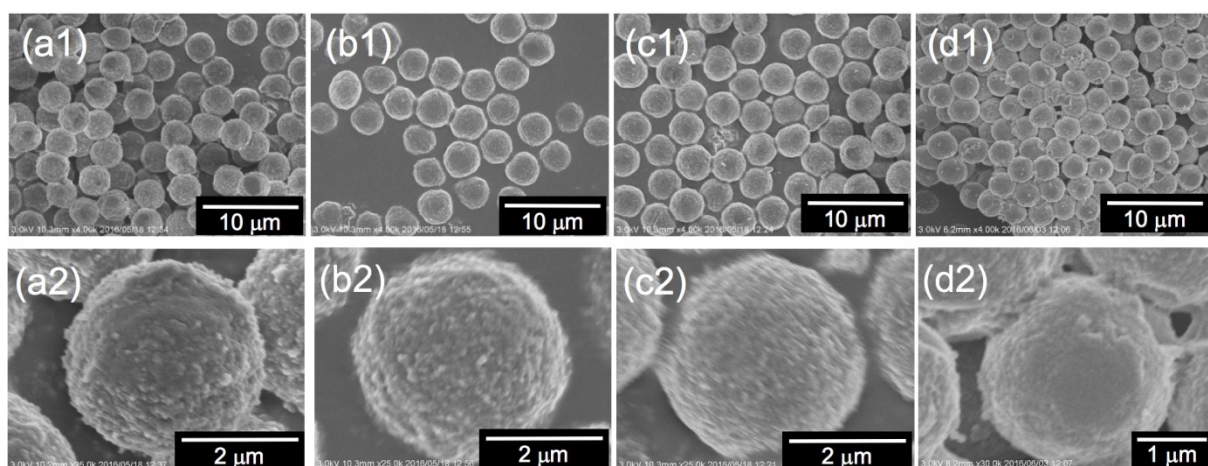

**Figure S2.** SEM images of the as-prepared microballs of  $\mu$ -PSt-g-PEI@SiO<sub>2</sub> mediated from (a) water, (b) methanol, (c) ethanol and (d) acetone.

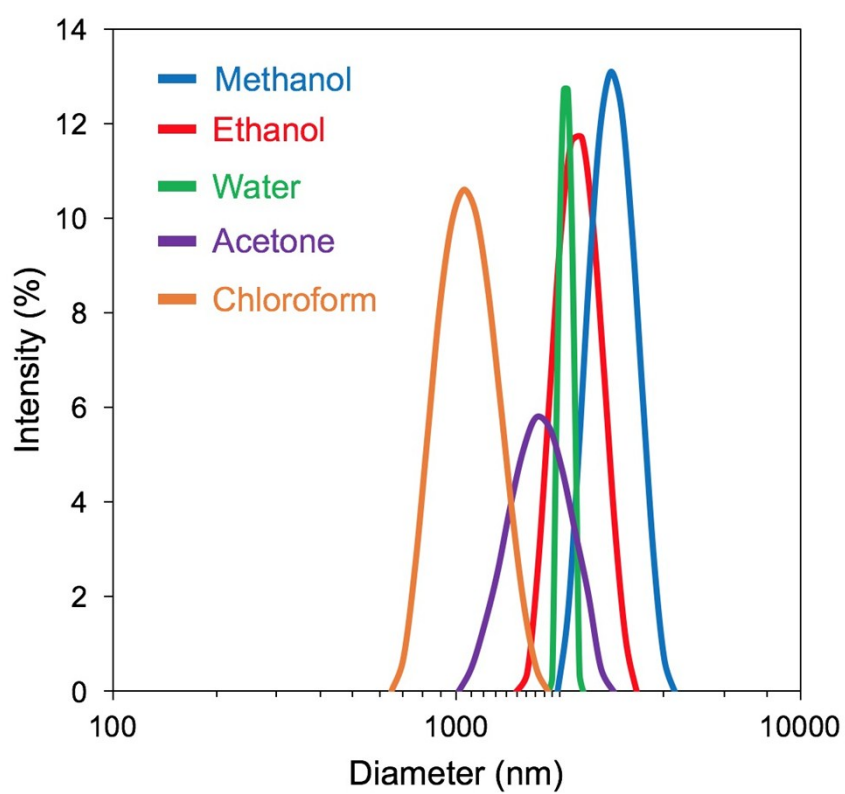

**Figure S3.** DLS curves of  $\mu$ -PSt-g-PEI in different solvents

*Scheme S1. Chemical etching of the silica microballs mediated from water*

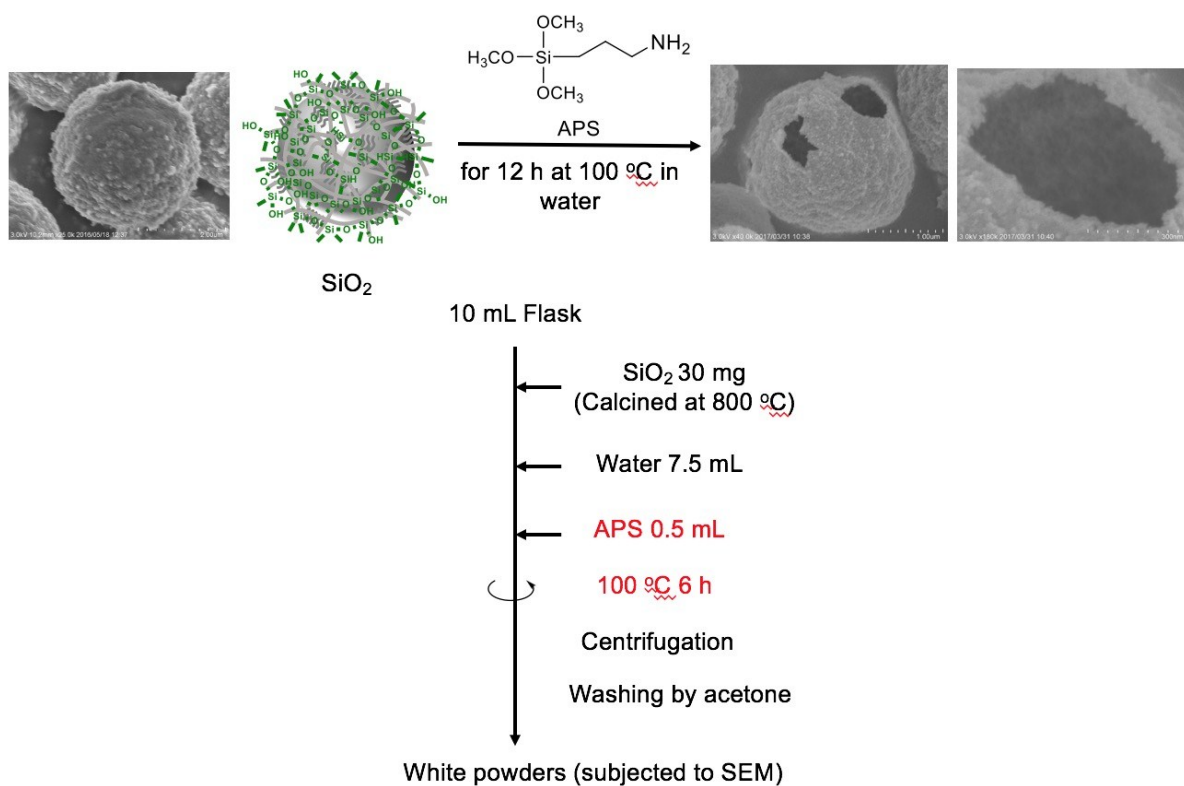

*Scheme S2. Chemical etching of the silica microballs mediated from methanol*

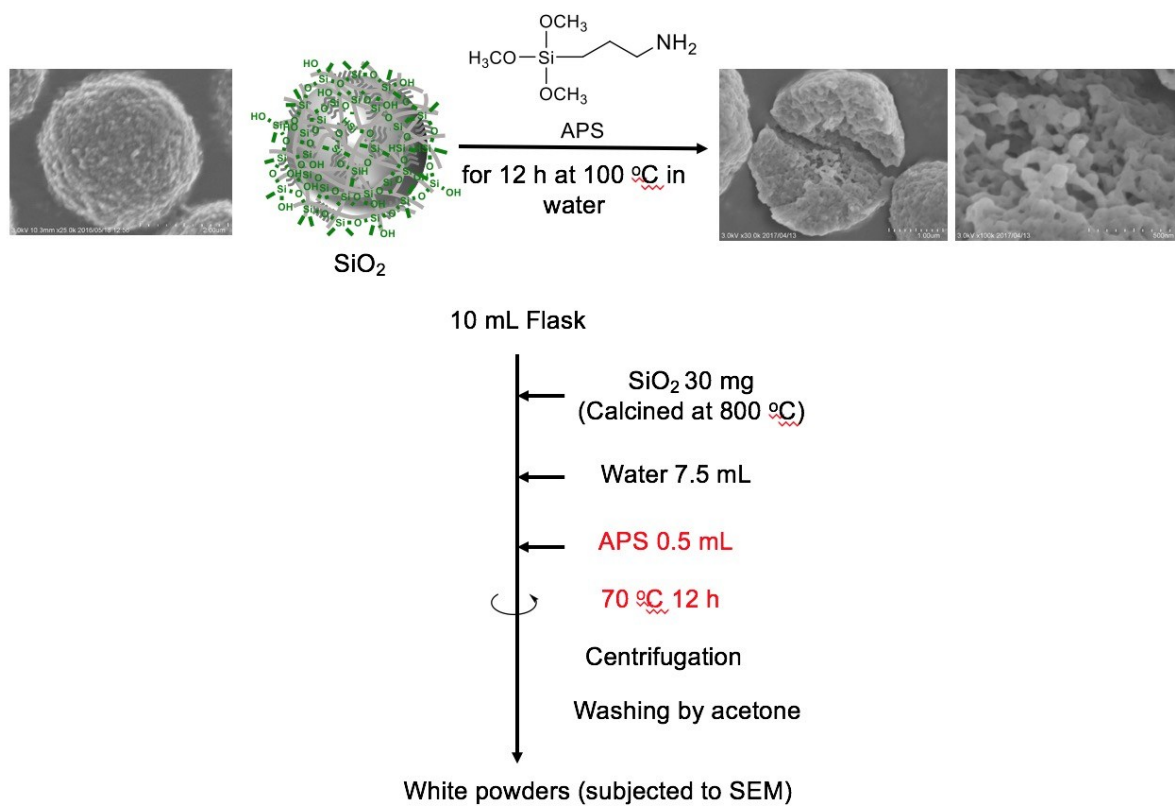

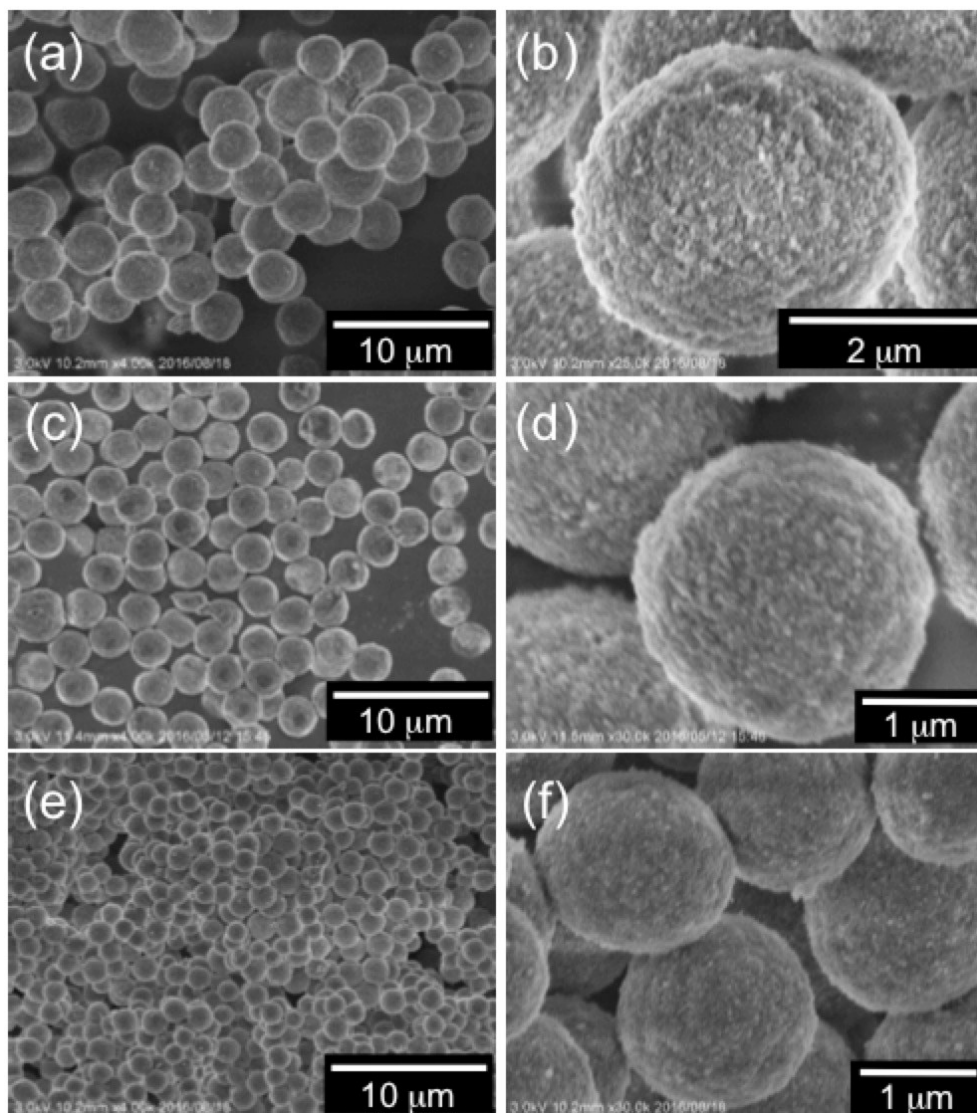

**Figure S4.** Influences of the calcination temperatures on the sizes of the silica microballs. Sample:  $\mu$ -PSt-g-PEI@SiO<sub>2</sub> mediated from methanol. Calcination temperatures: 700 (a, b), 800 (c, d), and 900 °C (e, f).

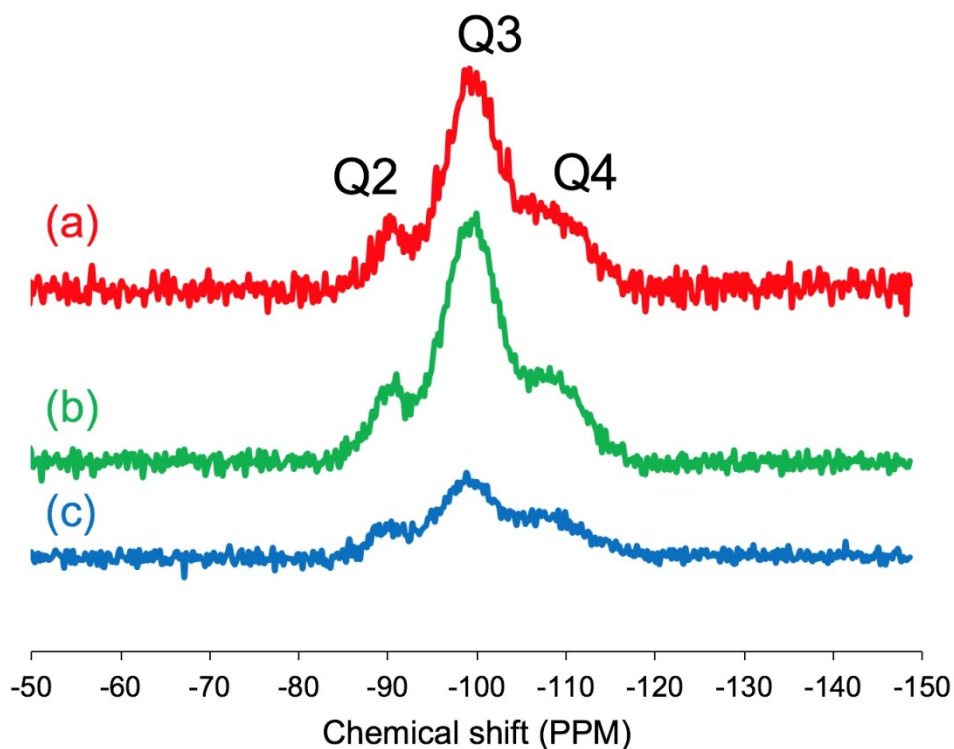

**Figure S5.**  $^{29}\text{Si}$  CP/MAS NMR spectra of silica microballs prepared by calcination of  $\mu\text{-PSt-g-PEI@SiO}_2$  mediated from methanol. Calcination temperature: (a) 700 °C, (b) 800 °C and (c) 900 °C.

**Table S1.** Integration values of silica microballs obtained by calcination of  $\mu\text{-PSt-g-PEI@SiO}_2$  mediated in methanol

| Calcination<br>temperature (°C) | Integration values (%) <sup>b)</sup> |      |      |
|---------------------------------|--------------------------------------|------|------|
|                                 | Q2                                   | Q3   | Q4   |
| 700                             | 10.0                                 | 65.2 | 24.8 |
| 800                             | 12.0                                 | 64.4 | 23.6 |
| 900                             | 18.4                                 | 51.1 | 31.7 |
